# Supplementary material for: Ionic liquid binary mixtures: how different factors contribute to determine their effect on the reactivity
Source: Royal Society of Chemistry journal article supplement (doi:10.1039/c6ra12836j), 2016-01-01
Supplement: c6ra12836j1.pdf [file c6ra12836j1.pdf]

## Supporting information

### Table of contents

|                                                                                                                                                                                                                  |    |
|------------------------------------------------------------------------------------------------------------------------------------------------------------------------------------------------------------------|----|
| <b>Table S1.</b> Observed kinetic constants for the reaction between 9-anthracenemethanol and N-ethylmaleimide at 313 K in the $[\text{Bzbim}]_x[\text{Bz}(\text{F}_5)\text{bim}]_{1-x}[\text{NTf}_2]$ mixtures. | S2 |
| <b>Table S2.</b> Observed kinetic constants for the reaction between 9-anthracenemethanol and N-ethylmaleimide at 313 K in the $[\text{Bzbim}][\text{NTf}_2]_x[\text{BF}_4]_{1-x}$ mixtures.                     | S3 |
| <b>Table S3.</b> Observed kinetic constants for the reaction between 9-anthracenemethanol and N-Ethylmaleimide at 313 K in the $[\text{Bzbim}]_x[\text{bEt}_3\text{N}]_{1-x}[\text{NTf}_2]$ mixtures.            | S4 |
| <b>Figure S1.</b> Plots of Kamlet-Taft and $E_{\text{NR}}$ polarity parameters determined in solution of $[\text{Bzbim}]_x[\text{bEt}_3\text{N}]_{1-x}[\text{NTf}_2]$ .                                          | S5 |
| <b>Figure S2.</b> $^1\text{H}$ NMR spectra of $[\text{Bzbim}]_x[\text{bEt}_3\text{N}]_{1-x}[\text{NTf}_2]$ mixtures.                                                                                             | S6 |

**Table S1.** Observed kinetic constants for the reaction between 9-anthracenemethanol and N-Ethylmaleimide at 313 K in the  $[\text{Bzbim}]_x[\text{Bz}(\text{F}_3)\text{bim}]_{1-x}[\text{NTf}_2]$  mixtures.

| <b>x</b> | <b><math>10^5 k \text{ (s}^{-1}\text{)}</math></b> |
|----------|----------------------------------------------------|
| 0        | 0.33                                               |
| 0.0523   | 0.80                                               |
| 0.195    | 0.98                                               |
| 0.397    | 1.06                                               |
| 0.504    | 1.06                                               |
| 0.601    | 1.04                                               |
| 0.692    | 0.98                                               |
| 0.805    | 0.90                                               |
| 0.849    | 0.87                                               |
| 0.944    | 0.96                                               |
| 1        | 1.41                                               |

**Table S2.** Observed kinetic constants for the reaction between 9-anthracenemethanol and N-Ethylmaleimide at 313 K in the [Bzbim][NTf<sub>2</sub>]<sub>x</sub>[BF<sub>4</sub>]<sub>1-x</sub> mixtures.

| <b>x</b> | <b>10<sup>5</sup> <i>k</i> (s<sup>-1</sup>)</b> |
|----------|-------------------------------------------------|
| 0.15     | 0.20                                            |
| 0.254    | 1.67                                            |
| 0.357    | 2.08                                            |
| 0.443    | 2.05                                            |
| 0.542    | 2.24                                            |
| 0.651    | 1.95                                            |
| 0.705    | 1.90                                            |
| 0.83     | 1.83                                            |
| 0.891    | 1.63                                            |
| 1        | 1.41                                            |

**Table S3.** Observed kinetic constants for the reaction between 9-anthracenemethanol and N-Ethylmaleimide at 313 K in the  $[\text{Bzbim}]_x[\text{bEt}_3\text{N}]_{1-x}[\text{NTf}_2]$  mixtures.

| <b>x</b> | <b><math>10^5 k \text{ (s}^{-1}\text{)}</math></b> |
|----------|----------------------------------------------------|
| 0        | 1.32                                               |
| 0.098    | 1.52                                               |
| 0.15     | 1.59                                               |
| 0.20     | 1.64                                               |
| 0.25     | 1.68                                               |
| 0.30     | 1.81                                               |
| 0.40     | 1.76                                               |
| 0.55     | 1.64                                               |
| 0.59     | 1.56                                               |
| 0.85     | 1.51                                               |
| 1        | 1.41                                               |

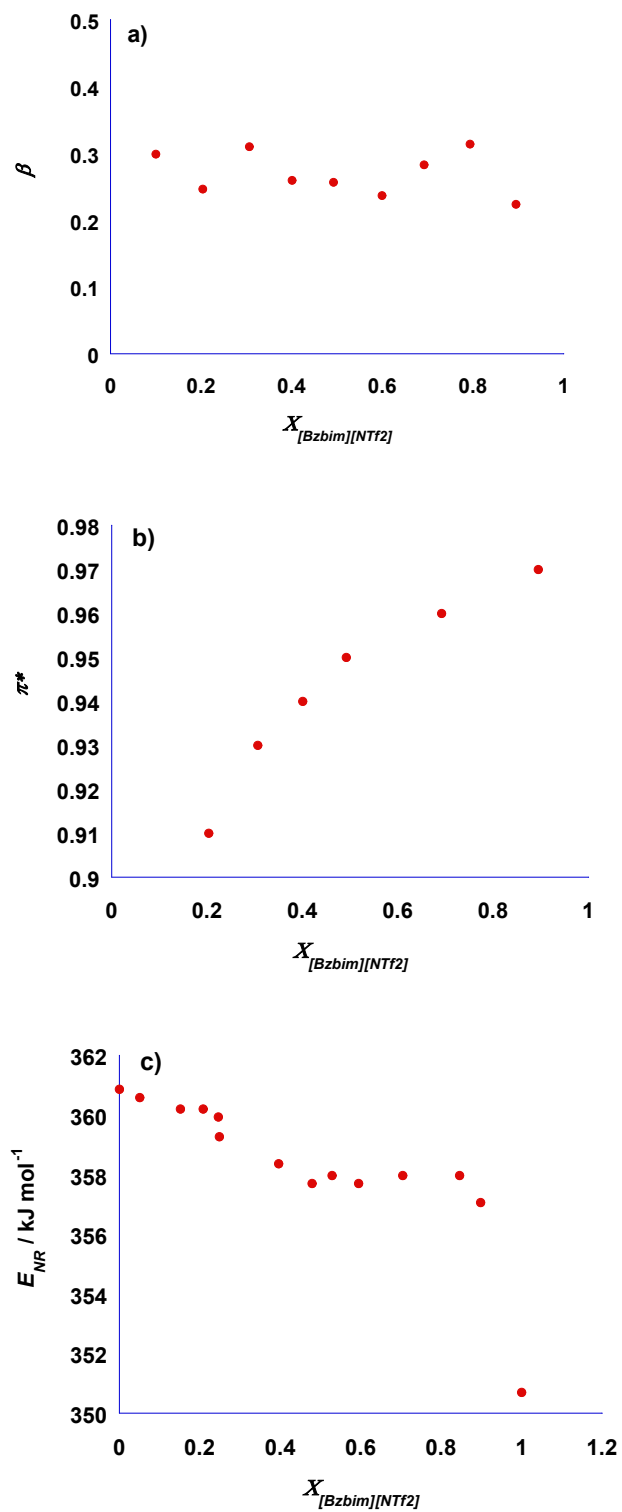

**Figure S1.** Plots of polarity parameters a) Kamlet-Taft  $\beta$ , b) Kamlet-Taft  $\pi^*$  and c)  $E_{NR}$  polarity parameters determined in solution of  $[\text{Bz bim}]_x[\text{bEt}_3\text{N}]_{1-x}[\text{NTf}_2]$ .

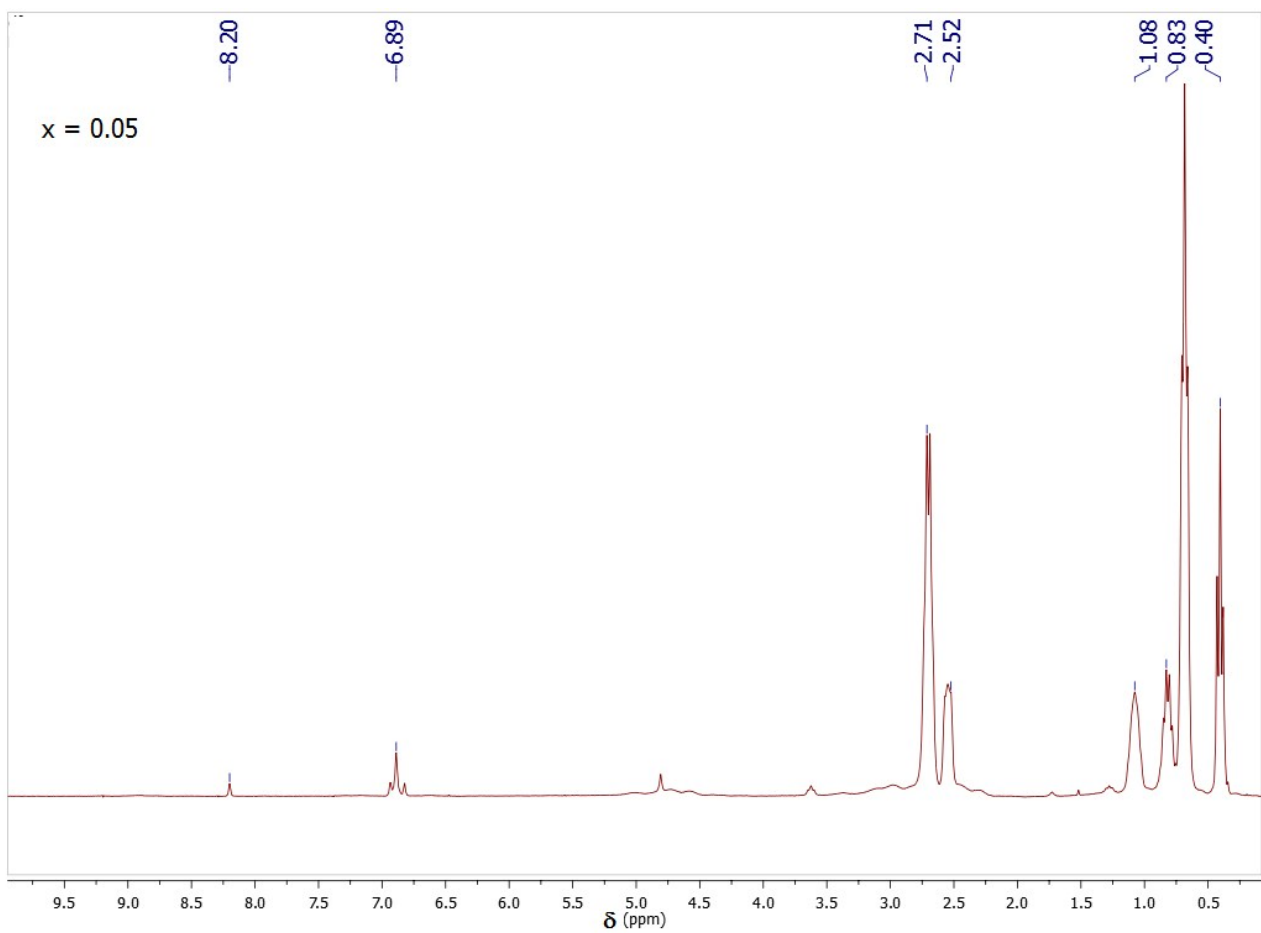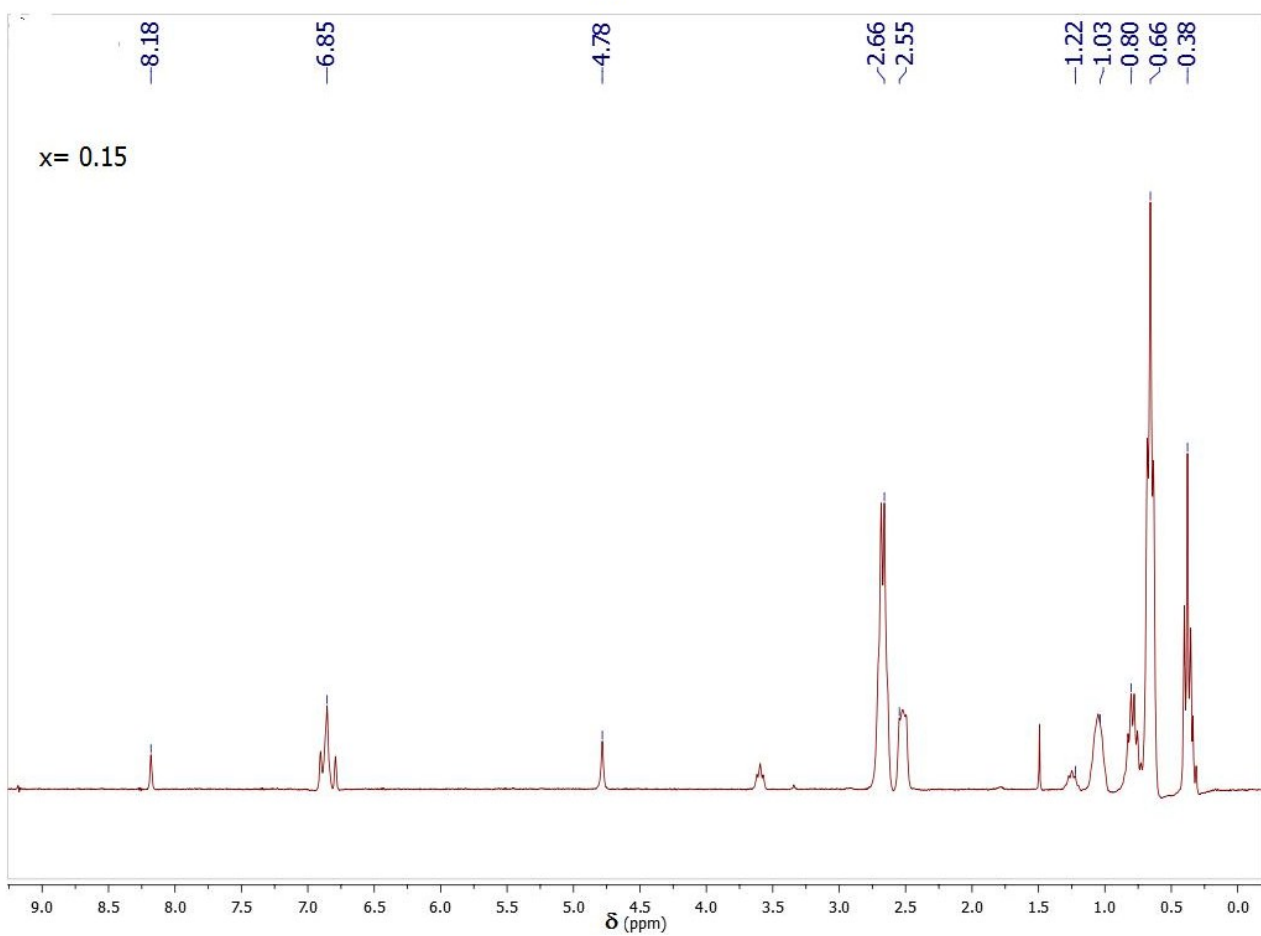

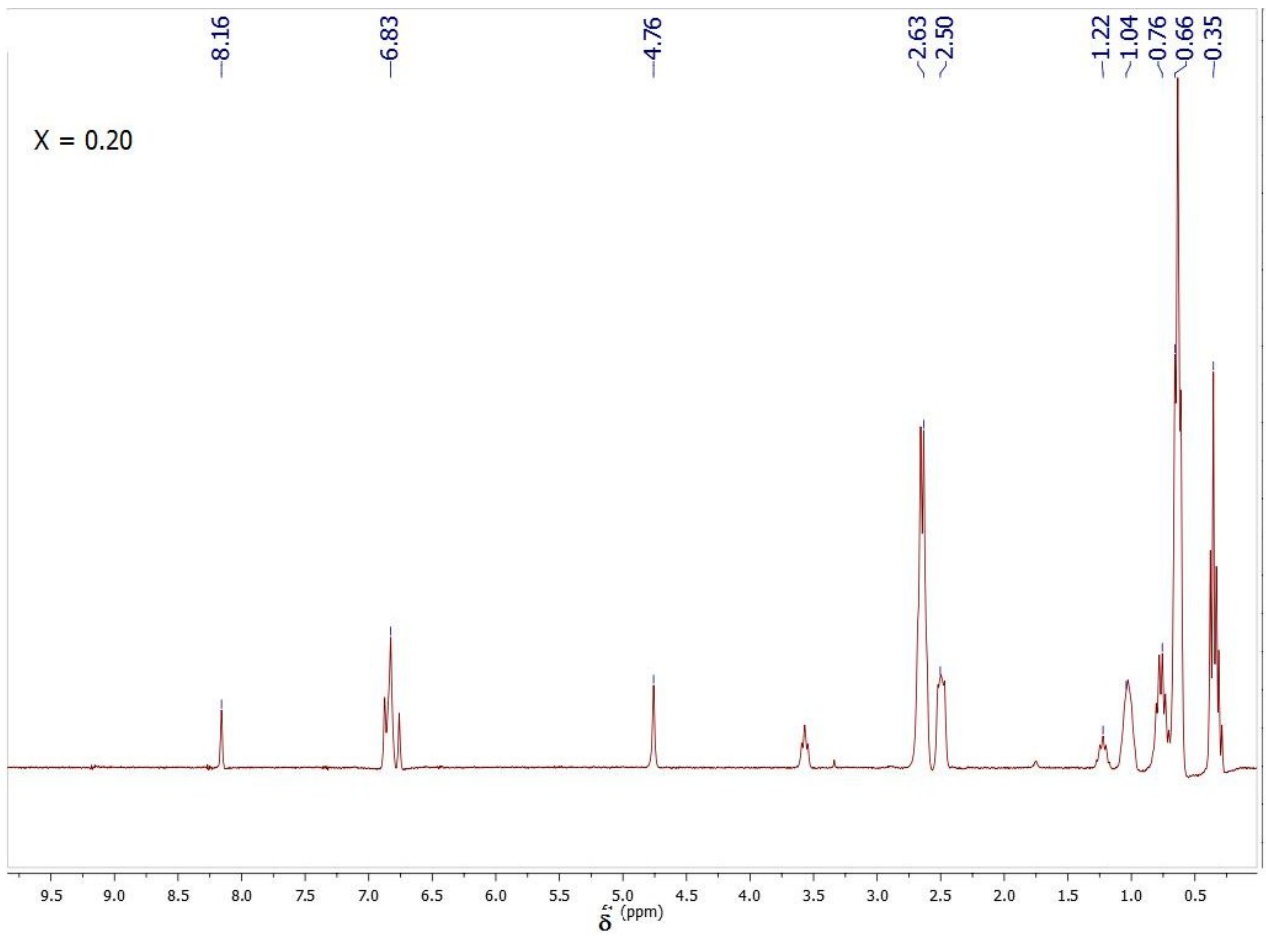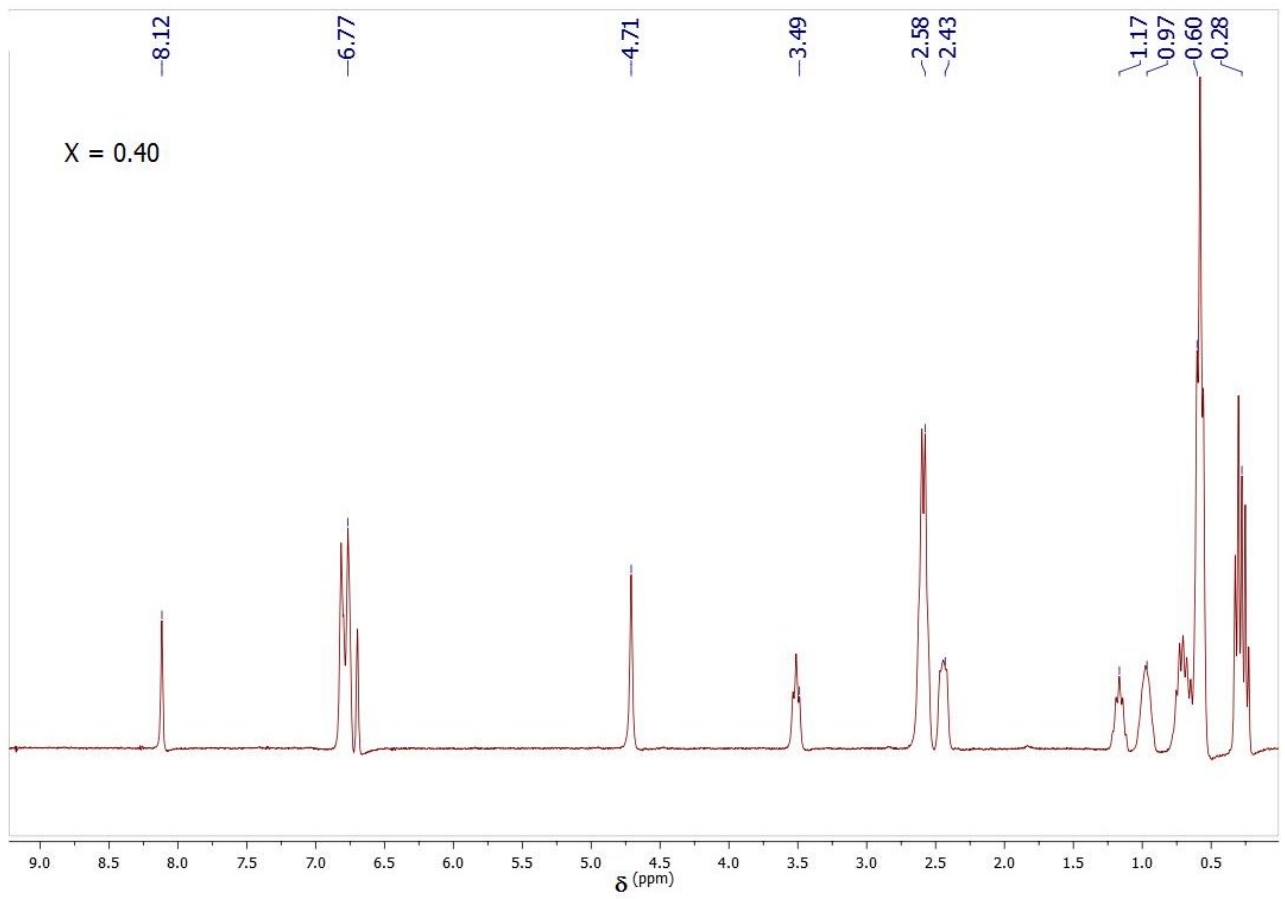

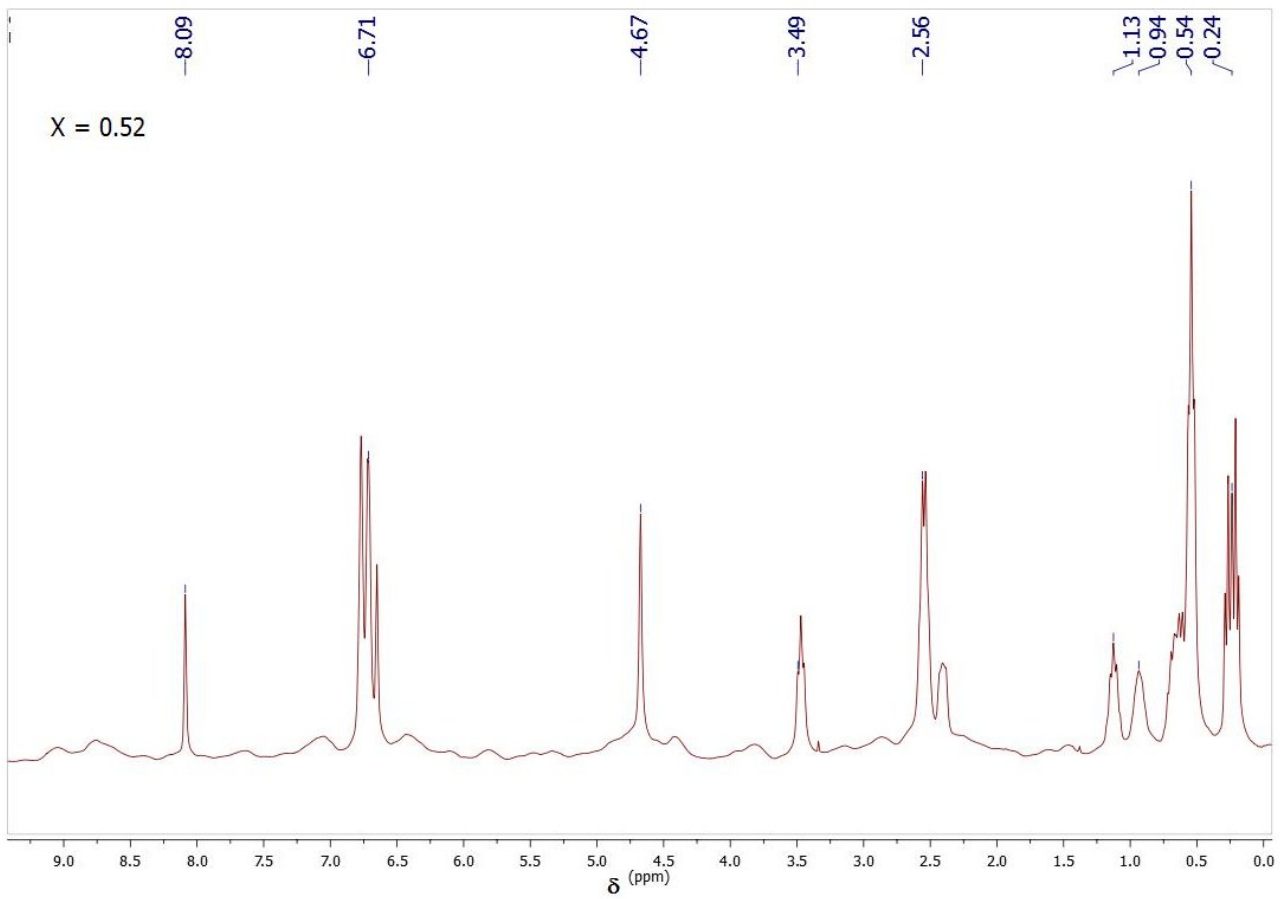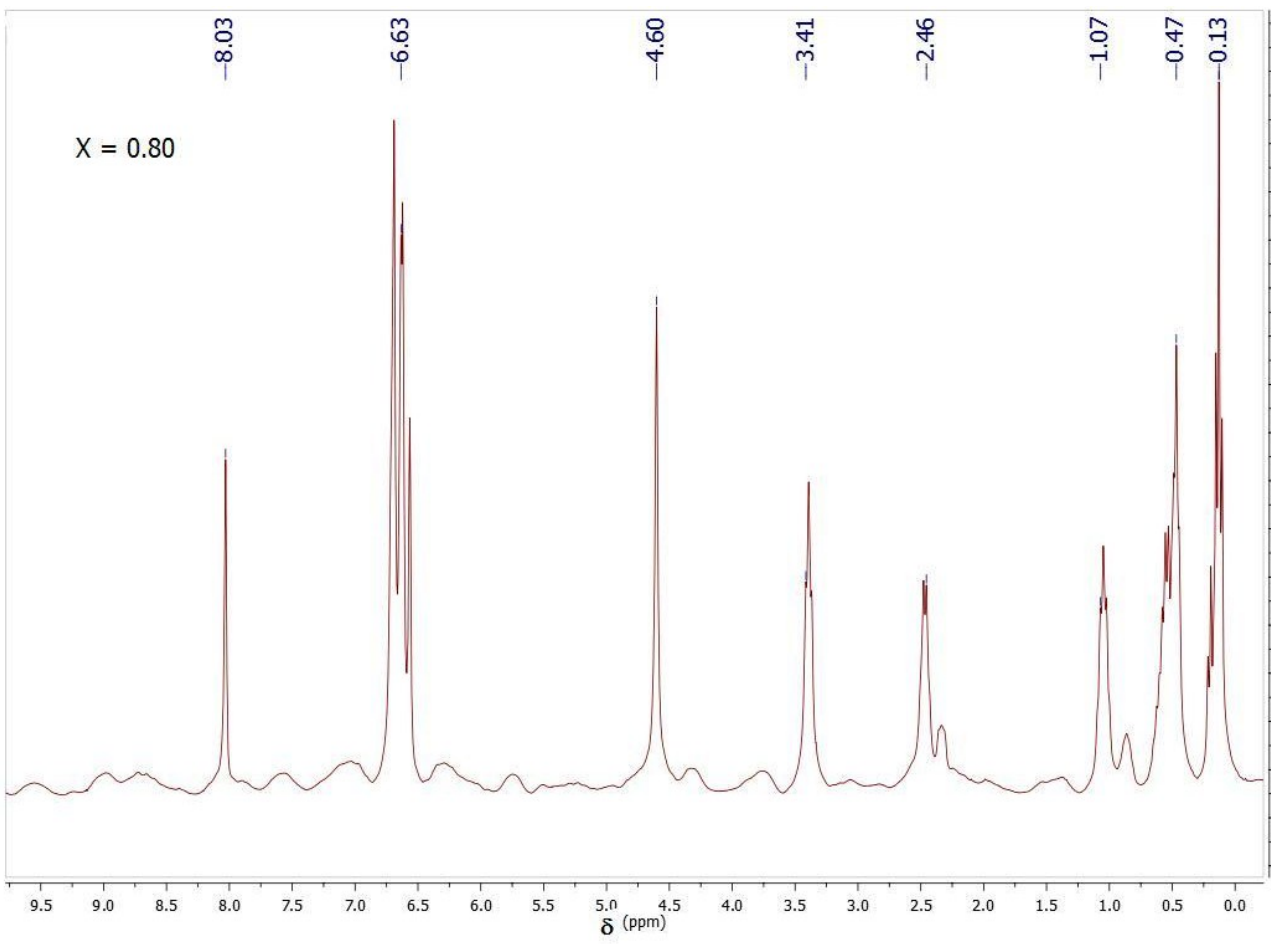



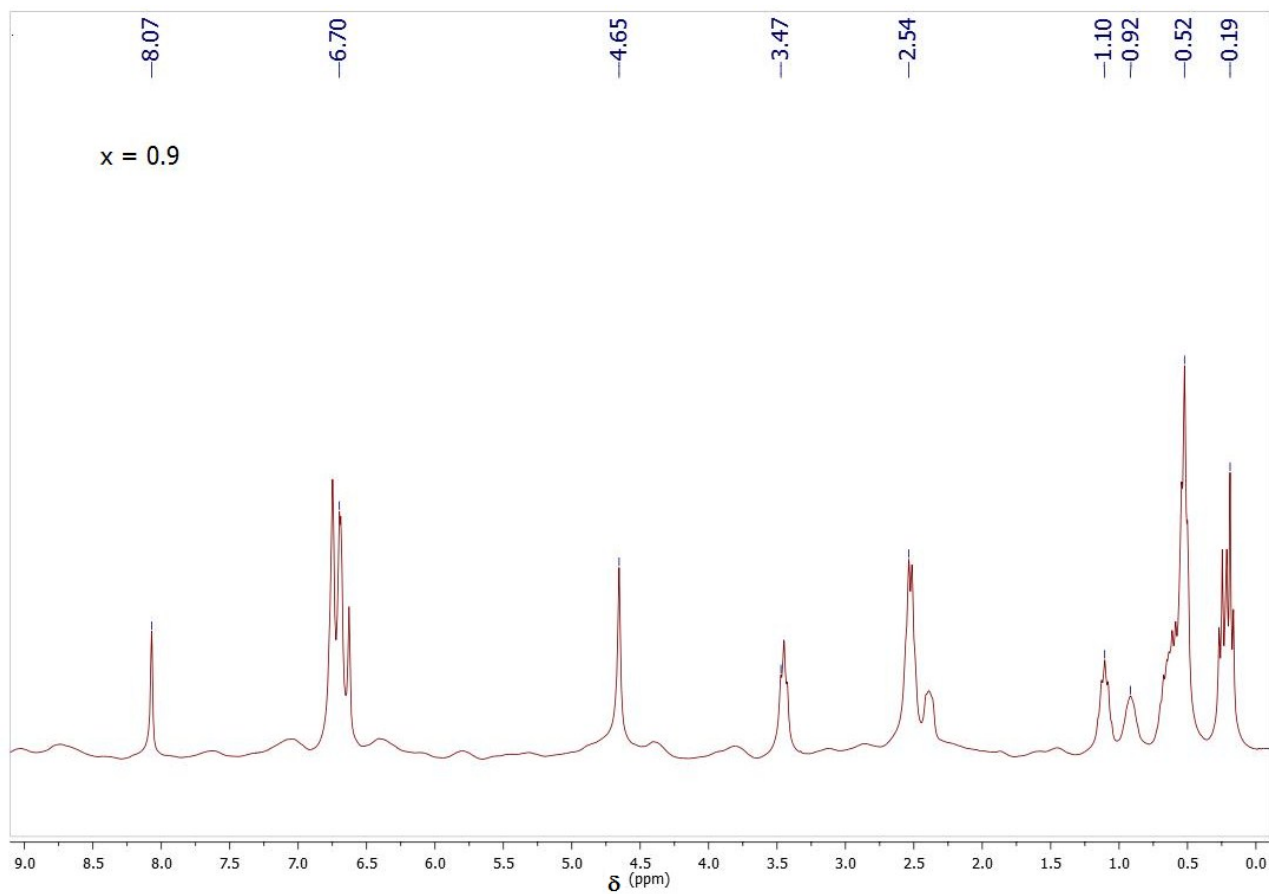

**Figure S2.** <sup>1</sup>H NMR spectra of [Bzbim]<sub>x</sub> [bEt<sub>3</sub>N]<sub>1-x</sub> [NTf<sub>2</sub>] mixtures.
